# Supplementary material for: Illuminating Host-Parasite Interaction at the Cellular and Subcellular Levels with Infrared Microspectroscopy
Source: MDPI journal article supplement (doi:10.3390/cells11050811), 2022-02-25
Supplement: s1 [file s1]

Supplementary materials:

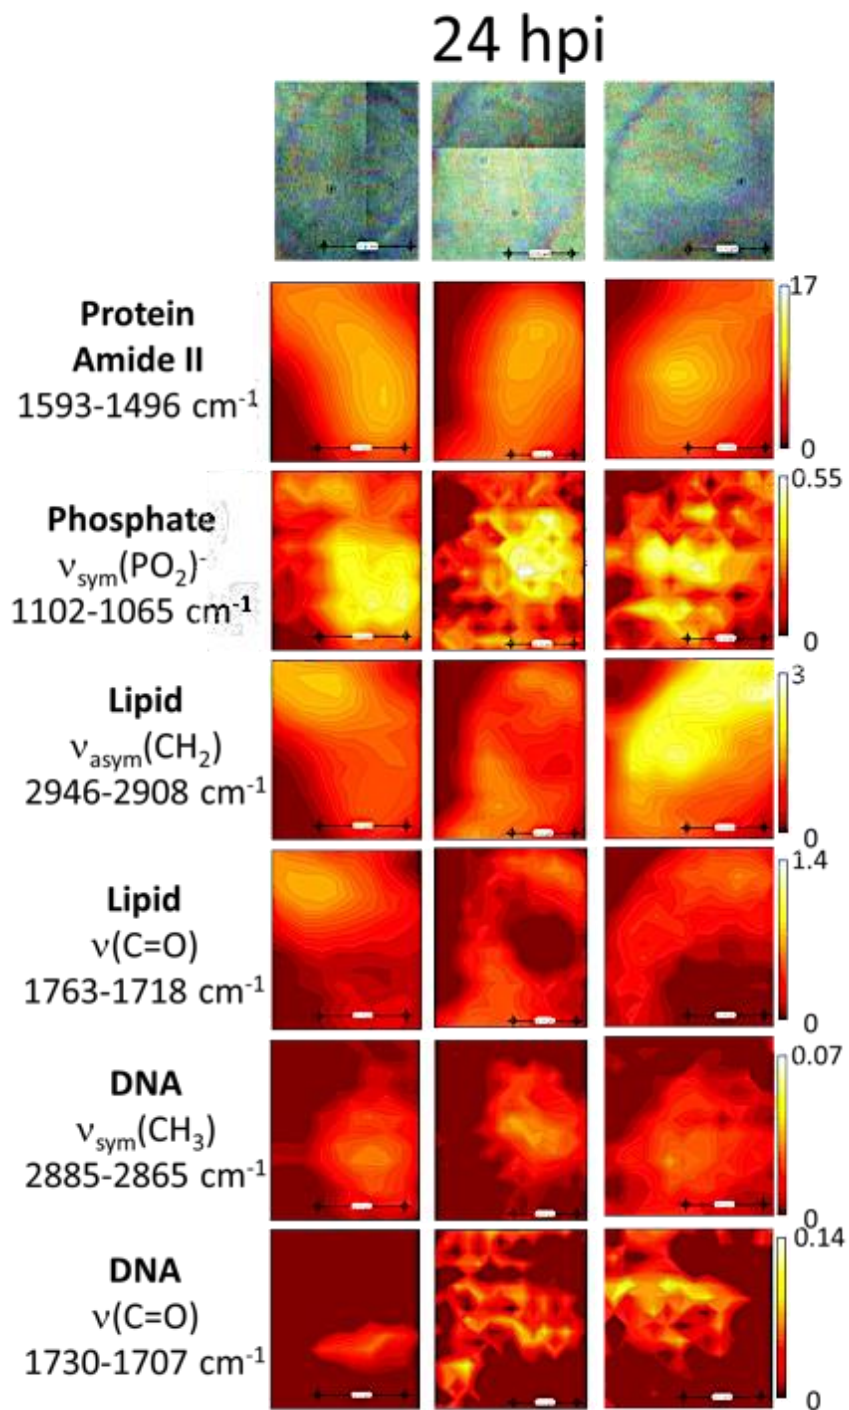

**Figure S1:** FTIR images (integration range shown on the left column) of the three other host cells at 24 hpi. Scale bars = 10  $\mu\text{m}$ .

## 24 h Cont'l

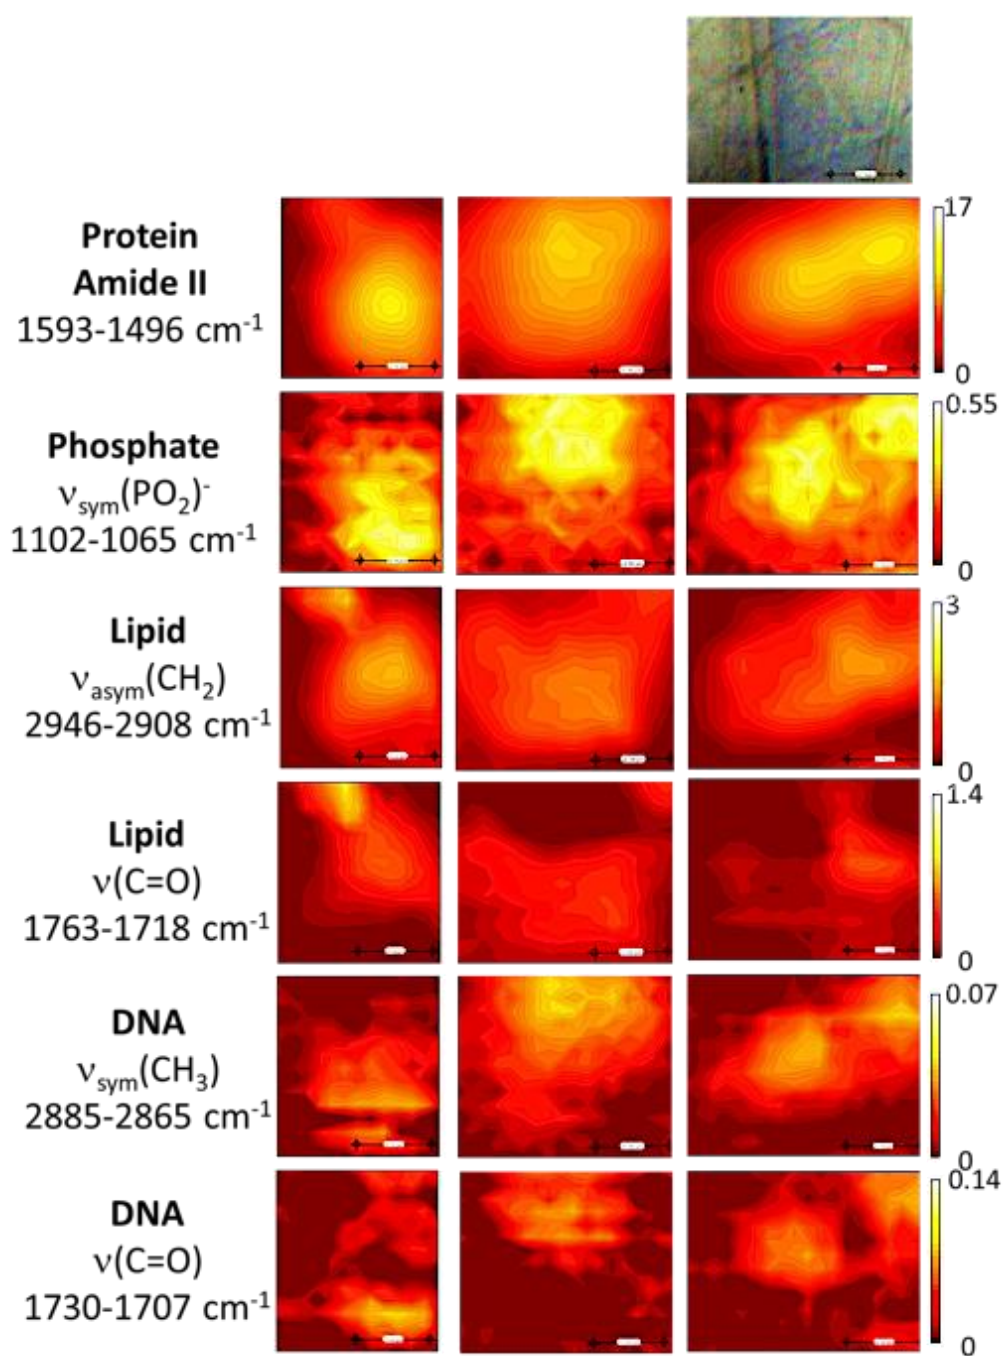

**Figure S2:** FTIR images (integration range shown on the left column) of the three other control cells at 24 h. The visible images were not collected for two cells. Scale bars = 10  $\mu\text{m}$ .

48 hpi

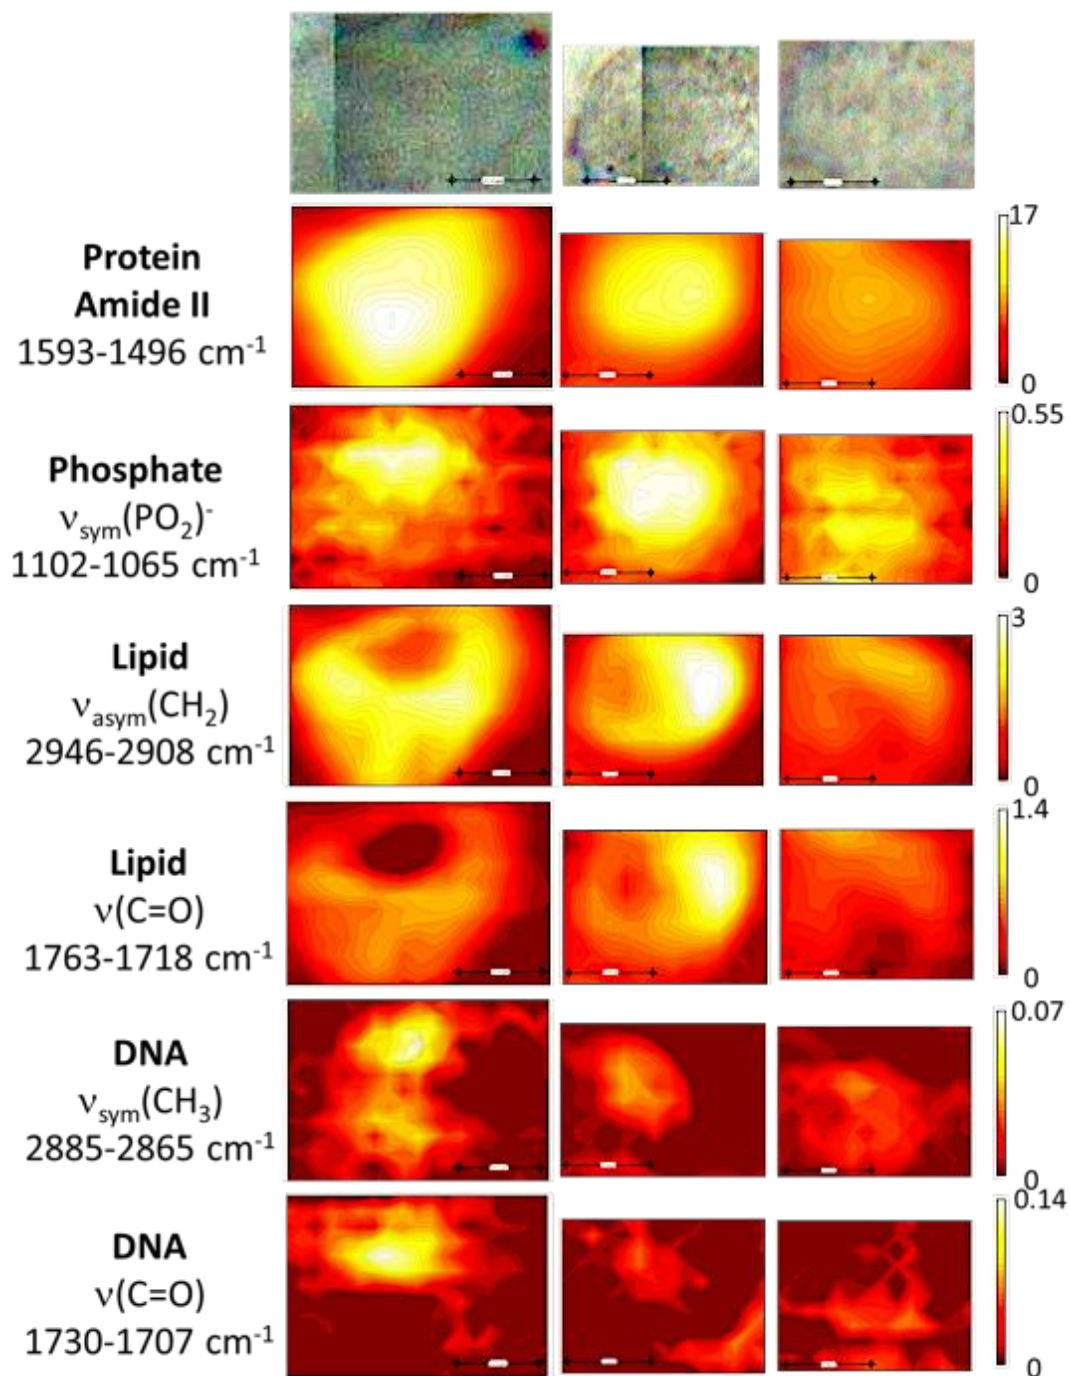

**Figure S3:** FTIR images (integration range shown on the left column) of the three other cells at 48 hpi. Scale bars = 10  $\mu\text{m}$ .

## 48 h Cont'l

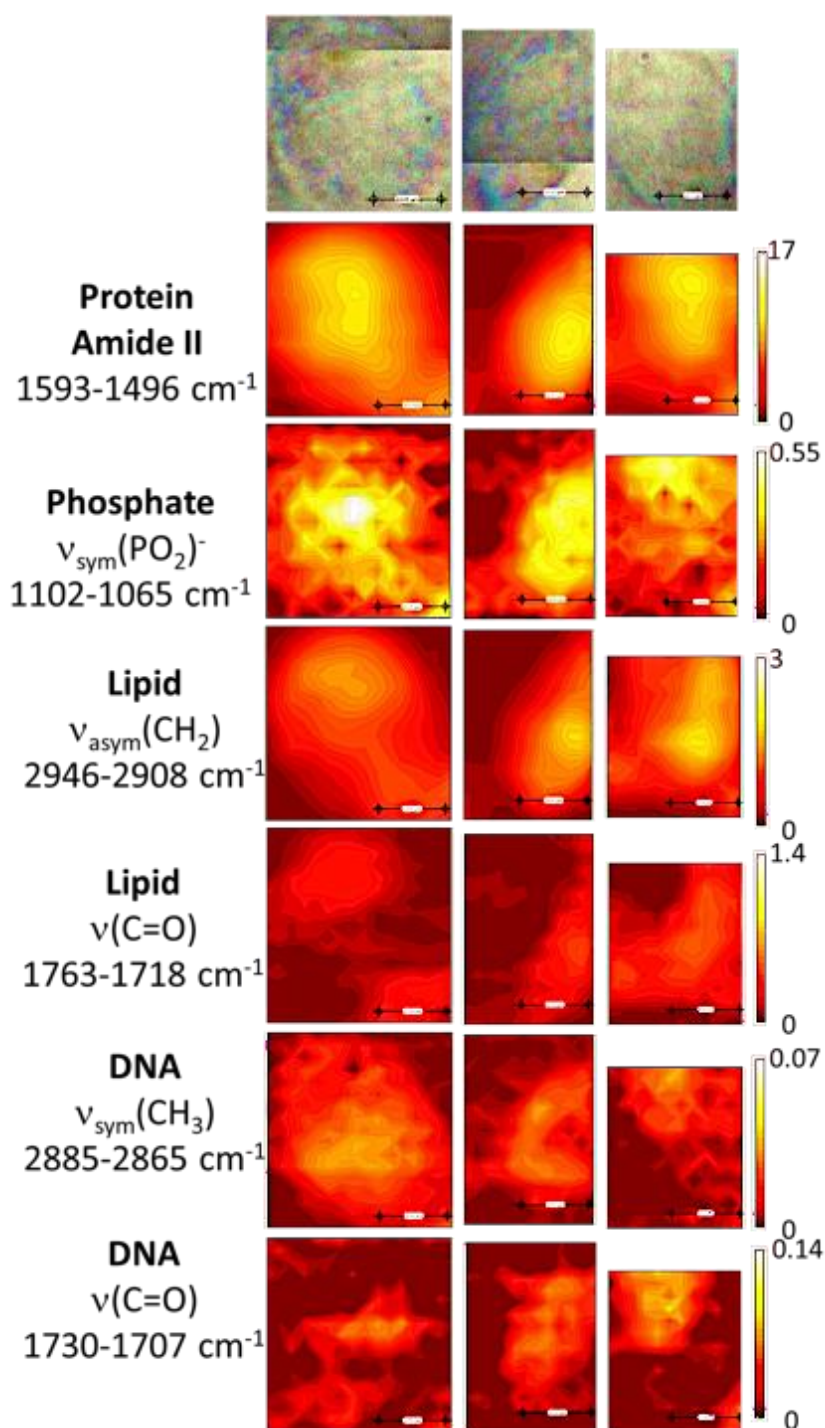

**Figure S4:** FTIR images (integration range shown on the left column) of the three other control cells at 48 h. Scale bars = 10  $\mu\text{m}$ .



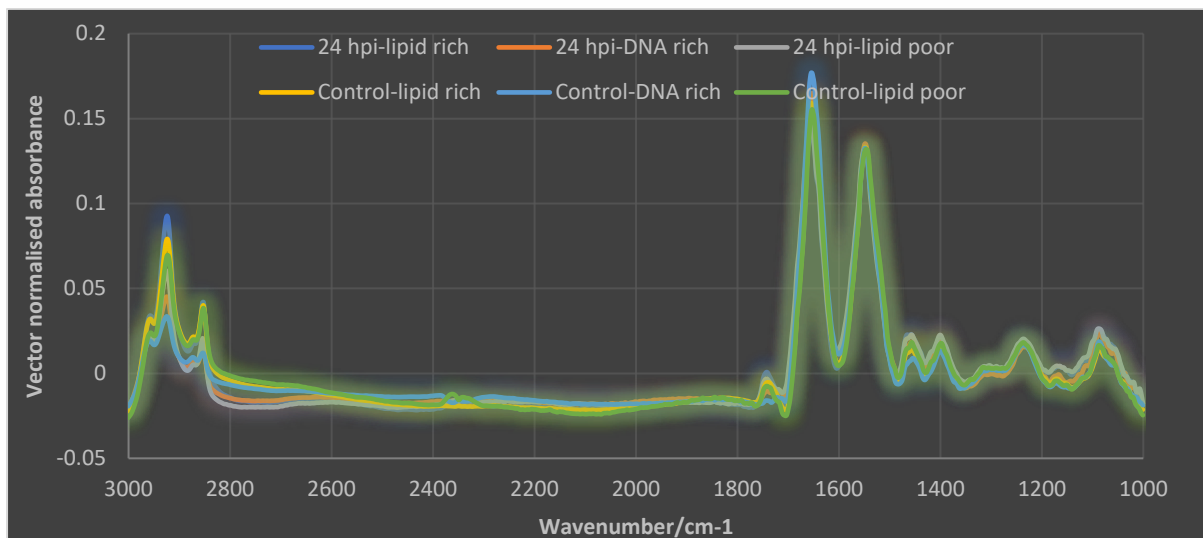

**Figure S5:** The extracted spectra of infected and control cells at 24 hpi from the lipid-rich, DNA-rich, and lipid-poor regions.

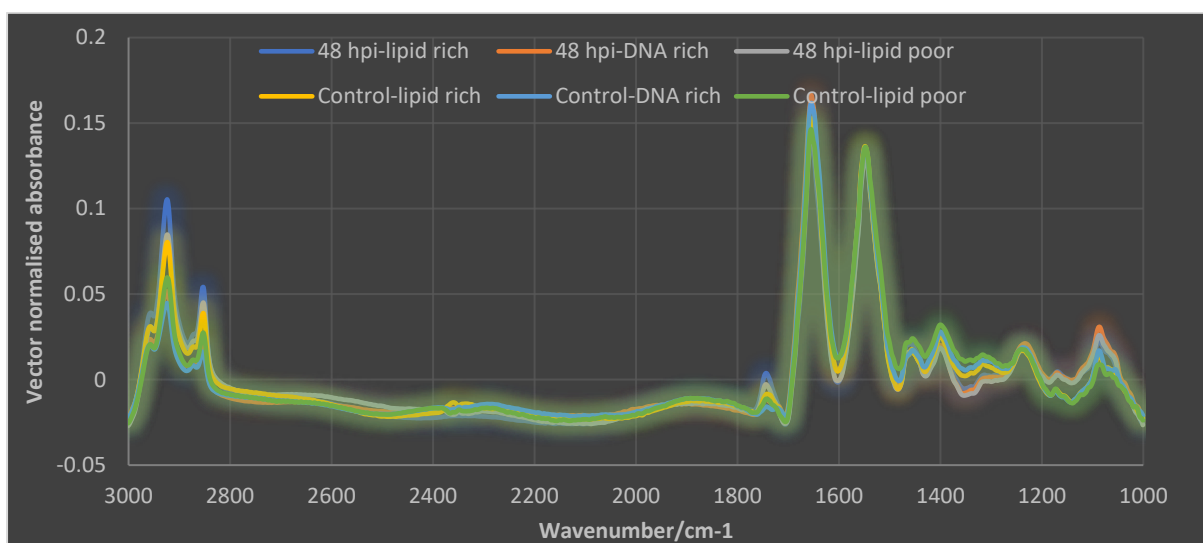

**Figure S6:** The extracted spectra of infected and control cells at 48 hpi from the lipid-rich, DNA-rich, and lipid-poor regions.

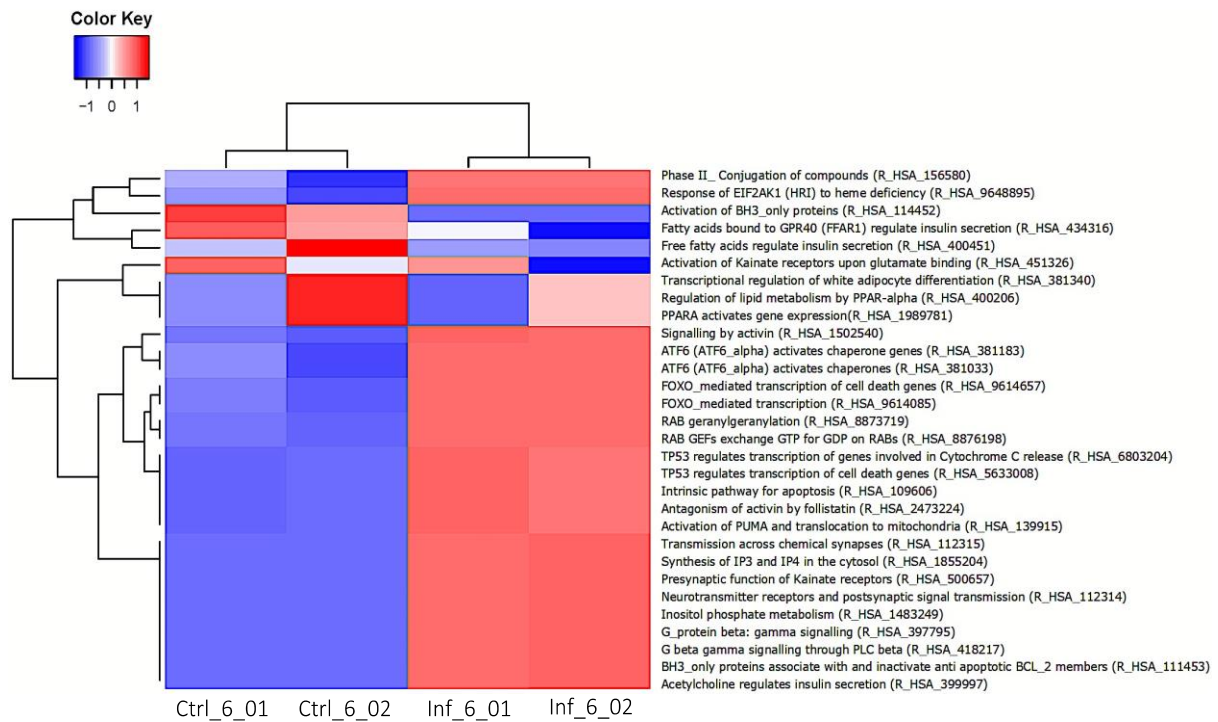

**Figure S7.** The top 30 pathways most significantly activated (red) or inactivated (blue) at 6 hpi by *T. gondii*. Columns represent replicates of the samples and rows represent individual pathways. The phylogenetic tree above the heatmap demonstrates the hierarchical clustering of the samples. The relationships between the pathways are shown on the left tree.

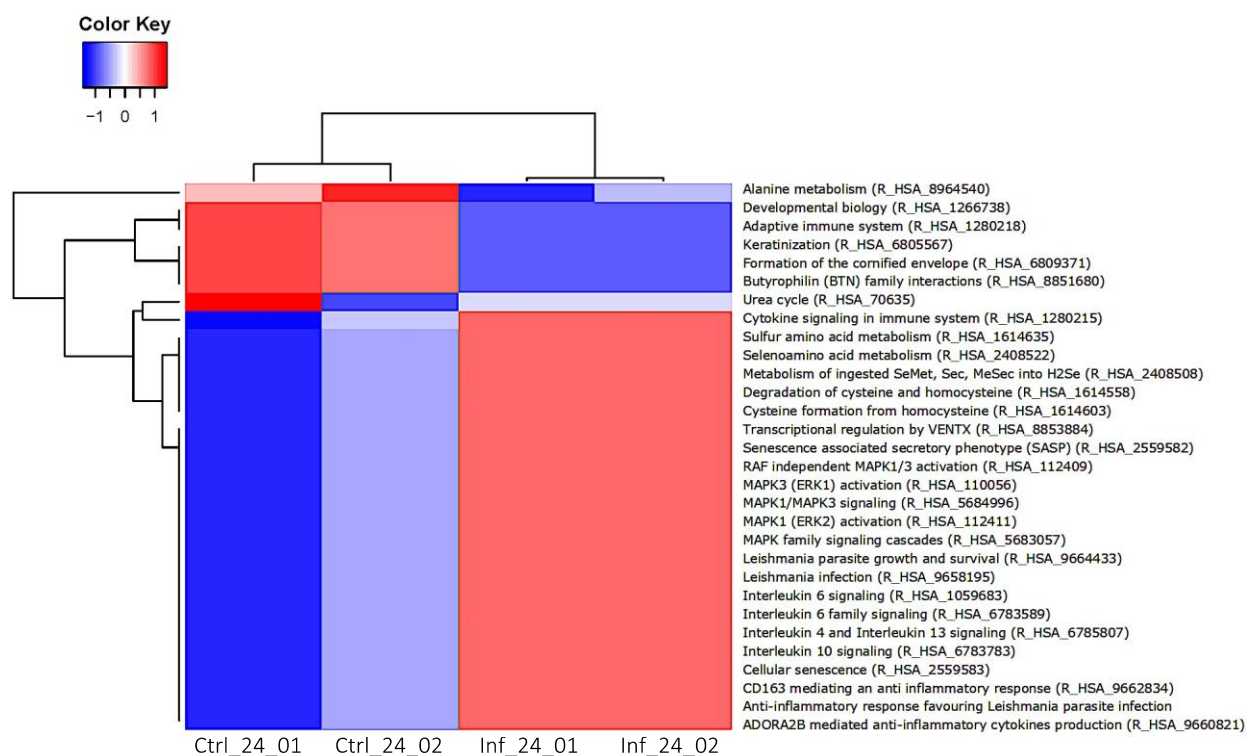

**Figure S8.** The top 30 pathways most significantly activated (red) or inactivated (blue) at 24 hpi by *T. gondii*. Columns represent replicates of the samples and rows represent individual pathways. The phylogenetic tree above the heatmap demonstrates the hierarchical clustering of the samples. The relationships between the pathways are shown on the left tree.

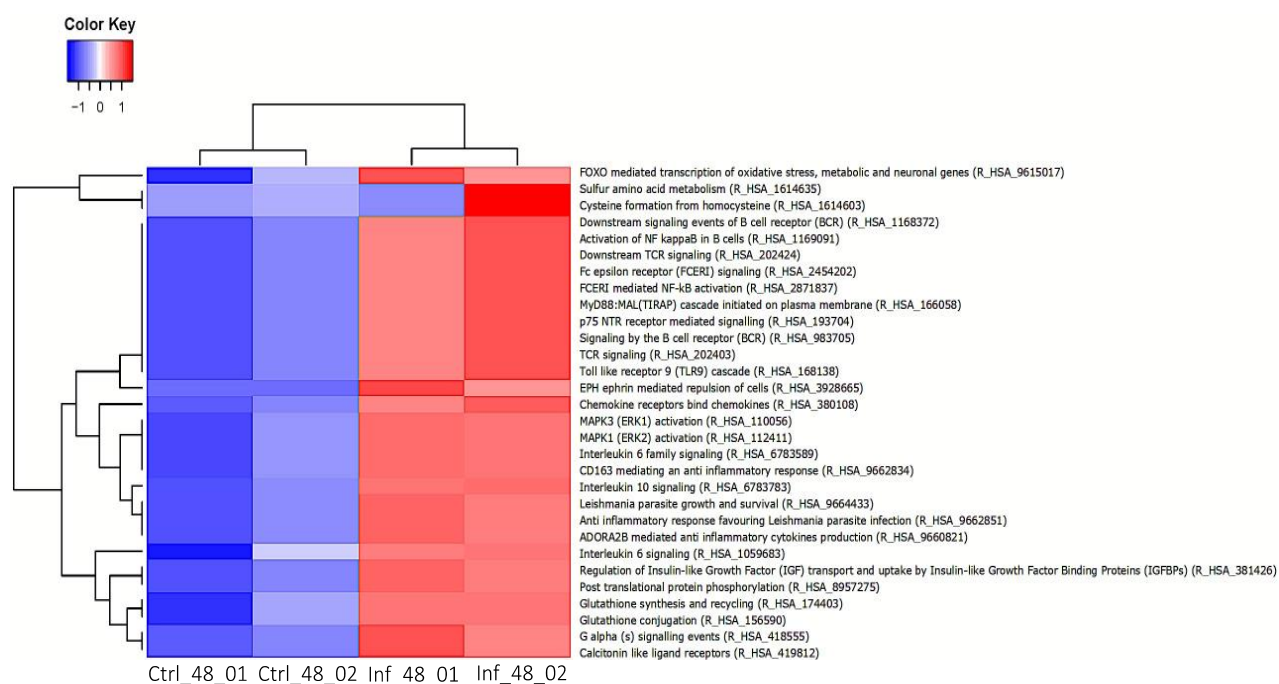

**Figure S9.** The top 30 pathways most significantly activated (red) or inactivated (blue) at 48 hpi by *T. gondii*. Columns represent replicates of the samples and rows represent individual pathways. The phylogenetic tree above the heatmap demonstrates the hierarchical clustering of the samples. The relationships between the pathways are shown on the left tree.



**Table S1.** Differentially expressed genes commonly detected at 6-, 24-, and 48-hours post *Toxoplasma gondii* infection.

| No | Gene_ID         | Gene Symbol | Log <sub>2</sub> FC |        |        |
|----|-----------------|-------------|---------------------|--------|--------|
|    |                 |             | 6 hpi               | 24 hpi | 48 hpi |
| 1  | ENSG00000128965 | CHAC1       | 2.21                | 2.49   | 2.44   |
| 2  | ENSG00000168209 | DDIT4       | 1.69                | 1.56   | 2.05   |
| 3  | ENSG00000226243 | RPL37AP1    | 1.11                | 1.01   | 1.87   |
| 4  | ENSG00000198712 | MT-CO2      | 1.35                | 1.29   | 3.39   |
| 5  | ENSG00000185567 | AHNAK2      | -1.53               | -1.01  | -1.84  |

**Table S2.** List of the 97 differentially expressed genes (23 upregulated and 74 downregulated) with FDR < 0.05 and absolute log<sub>2</sub> FC < -1 and > 1 at 6 hpi. The respective gene identifier, gene symbol, and log<sub>2</sub> FC are shown.

| No | Gene_ID         | Gene Symbol | Log <sub>2</sub> FC | logCPM  | FDR      |
|----|-----------------|-------------|---------------------|---------|----------|
| 1  | ENSG00000128965 | CHAC1       | 2.21137             | 5.699   | 1.15E-63 |
| 2  | ENSG00000182621 | PLCB1       | 1.7036              | 2.0725  | 9.68E-12 |
| 3  | ENSG00000168209 | DDIT4       | 1.6865              | 6.0611  | 3.60E-81 |
| 4  | ENSG00000198938 | MT-CO3      | 1.64226             | 15.374  | 2.88E-16 |
| 5  | ENSG00000198840 | MT-ND3      | 1.63625             | 12.4749 | 2.27E-14 |
| 6  | ENSG00000198727 | MT-CYB      | 1.60798             | 12.4027 | 5.04E-14 |
| 7  | ENSG00000130766 | SESN2       | 1.43969             | 5.4179  | 4.21E-29 |
| 8  | ENSG00000198712 | MT-CO2      | 1.35035             | 13.3135 | 3.70E-11 |
| 9  | ENSG00000175197 | DDIT3       | 1.33766             | 3.0946  | 8.65E-13 |
| 10 | ENSG00000155961 | RAB39B      | 1.2788              | 2.818   | 1.22E-10 |
| 11 | ENSG00000227063 | RPL41P1     | 1.26597             | 5.8127  | 9.92E-17 |
| 12 | ENSG00000134363 | FST         | 1.17069             | 3.2283  | 2.06E-08 |
| 13 | ENSG00000090932 | DLL3        | 1.13526             | 3.2414  | 8.75E-06 |
| 14 | ENSG00000198786 | MT-ND5      | 1.13293             | 9.4449  | 2.17E-06 |
| 15 | ENSG00000212907 | MT-ND4L     | 1.12138             | 9.0146  | 2.90E-06 |
| 16 | ENSG00000226243 | RPL37AP1    | 1.11171             | 3.084   | 3.86E-09 |
| 17 | ENSG00000232888 | RPS11P5     | 1.09897             | 2.3982  | 2.90E-06 |
| 18 | ENSG00000105327 | BBC3        | 1.09268             | 2.7863  | 2.67E-08 |
| 19 | ENSG00000177600 | RPLP2       | 1.04567             | 10.2259 | 5.04E-14 |
| 20 | ENSG00000214756 | CSKMT       | 1.03111             | 2.6142  | 4.81E-07 |
| 21 | ENSG00000108958 | AC130689.1  | 1.02988             | 2.1807  | 1.02E-05 |
| 22 | ENSG00000164136 | IL15        | 1.02138             | 2.4457  | 4.01E-06 |
| 23 | ENSG00000143013 | LMO4        | 1.00543             | 5.756   | 5.62E-19 |
| 24 | ENSG00000197386 | HTT         | -1.00121            | 3.7237  | 1.34E-07 |
| 25 | ENSG00000198742 | SMURF1      | -1.00211            | 3.464   | 5.18E-08 |
| 26 | ENSG00000197299 | BLM         | -1.00267            | 2.3634  | 1.12E-05 |
| 27 | ENSG00000103197 | TSC2        | -1.00632            | 2.5565  | 5.52E-06 |
| 28 | ENSG00000138780 | GSTCD       | -1.00838            | 3.4833  | 1.26E-07 |
| 29 | ENSG00000140525 | FANCI       | -1.009              | 5.3883  | 1.23E-13 |
| 30 | ENSG00000107862 | GBF1        | -1.00904            | 3.8097  | 4.08E-08 |
| 31 | ENSG00000174373 | RALGAPA1    | -1.01566            | 1.9359  | 6.12E-05 |
| 32 | ENSG00000048707 | VPS13D      | -1.01832            | 2.4049  | 7.56E-05 |
| 33 | ENSG00000088247 | KHSRP       | -1.02324            | 5.3564  | 4.40E-08 |
| 34 | ENSG00000157933 | SKI         | -1.0237             | 3.4035  | 7.09E-08 |
| 35 | ENSG00000130702 | LAMA5       | -1.02883            | 3.9008  | 3.06E-04 |
| 36 | ENSG00000038532 | CLEC16A     | -1.03078            | 2.1045  | 4.32E-05 |
| 37 | ENSG00000124228 | DDX27       | -1.03166            | 3.4793  | 2.29E-07 |
| 38 | ENSG00000144583 | MARCH4      | -1.03693            | 3.782   | 2.08E-10 |

|    |                 |           |          |        |          |
|----|-----------------|-----------|----------|--------|----------|
| 39 | ENSG00000184661 | CDCA2     | -1.03904 | 3.6099 | 1.25E-09 |
| 40 | ENSG00000099204 | ABLIM1    | -1.04389 | 4.0519 | 5.13E-10 |
| 41 | ENSG00000177084 | POLE      | -1.04659 | 3.6927 | 2.55E-09 |
| 42 | ENSG00000166326 | TRIM44    | -1.0482  | 5.2116 | 1.56E-14 |
| 43 | ENSG00000133816 | MICAL2    | -1.0532  | 6.8148 | 5.68E-16 |
| 44 | ENSG00000126243 | LRFN3     | -1.05377 | 1.8531 | 1.04E-04 |
| 45 | ENSG00000173692 | PSMD1     | -1.05693 | 5.6717 | 3.09E-18 |
| 46 | ENSG00000135048 | TMEM2     | -1.06374 | 2.3927 | 3.95E-06 |
| 47 | ENSG00000181222 | POLR2A    | -1.0693  | 4.0283 | 1.12E-03 |
| 48 | ENSG00000241973 | PI4KA     | -1.072   | 3.3148 | 8.59E-08 |
| 49 | ENSG00000126746 | ZNF384    | -1.07243 | 2.3625 | 3.09E-06 |
| 50 | ENSG00000068650 | ATP11A    | -1.07535 | 1.9392 | 8.29E-05 |
| 51 | ENSG00000109805 | NCAPG     | -1.07933 | 5.3892 | 3.28E-13 |
| 52 | ENSG00000163913 | IFT122    | -1.08473 | 1.9409 | 3.65E-05 |
| 53 | ENSG00000125447 | GGA3      | -1.08958 | 1.9578 | 1.92E-05 |
| 54 | ENSG00000189057 | FAM111B   | -1.09305 | 2.432  | 2.19E-06 |
| 55 | ENSG00000151422 | FER       | -1.10157 | 2.0018 | 2.99E-05 |
| 56 | ENSG00000133422 | MORC2     | -1.10525 | 2.5594 | 1.87E-07 |
| 57 | ENSG00000017797 | RALBP1    | -1.11206 | 3.9272 | 1.51E-10 |
| 58 | ENSG00000160294 | MCM3AP    | -1.11556 | 4.025  | 7.95E-12 |
| 59 | ENSG00000102858 | MGRN1     | -1.12002 | 2.2899 | 9.79E-06 |
| 60 | ENSG00000111647 | UHRF1BP1L | -1.12193 | 3.6976 | 3.47E-11 |
| 61 | ENSG00000135913 | USP37     | -1.12271 | 1.9356 | 1.66E-05 |
| 62 | ENSG00000172037 | LAMB2     | -1.14375 | 2.252  | 3.19E-04 |
| 63 | ENSG00000126461 | SCAF1     | -1.15202 | 3.9427 | 1.83E-04 |
| 64 | ENSG00000253729 | PRKDC     | -1.15397 | 5.5036 | 2.28E-15 |
| 65 | ENSG00000106976 | DNM1      | -1.15565 | 2.1424 | 3.15E-05 |
| 66 | ENSG00000021826 | CPS1      | -1.15789 | 1.846  | 1.01E-05 |
| 67 | ENSG00000179134 | SAMD4B    | -1.16254 | 3.5256 | 2.25E-08 |
| 68 | ENSG00000128191 | DGCR8     | -1.17314 | 3.3565 | 1.20E-09 |
| 69 | ENSG00000115904 | SOS1      | -1.1808  | 2.6081 | 1.24E-07 |
| 70 | ENSG00000138385 | SSB       | -1.18608 | 4.0713 | 2.50E-14 |
| 71 | ENSG00000070047 | PHRF1     | -1.19024 | 2.2739 | 4.86E-04 |
| 72 | ENSG00000111331 | OAS3      | -1.19377 | 3.5845 | 5.68E-11 |
| 73 | ENSG00000122515 | ZMIZ2     | -1.19984 | 3.3129 | 4.26E-04 |
| 74 | ENSG00000100345 | MYH9      | -1.20069 | 6.9686 | 6.06E-04 |
| 75 | ENSG00000196547 | MAN2A2    | -1.21683 | 1.9157 | 3.14E-06 |
| 76 | ENSG00000136731 | UGGT1     | -1.22896 | 3.4022 | 1.03E-08 |
| 77 | ENSG00000101639 | CEP192    | -1.22989 | 3.3853 | 1.59E-10 |
| 78 | ENSG00000134697 | GNL2      | -1.26171 | 3.7116 | 4.42E-12 |
| 79 | ENSG00000096433 | ITPR3     | -1.265   | 3.7242 | 1.53E-05 |
| 80 | ENSG00000178209 | PLEC      | -1.27706 | 6.4746 | 7.26E-06 |

|    |                 |                   |          |        |          |
|----|-----------------|-------------------|----------|--------|----------|
| 81 | ENSG00000197694 | SPTAN1            | -1.30293 | 4.1234 | 1.67E-05 |
| 82 | ENSG00000198420 | TCAF1             | -1.31775 | 2.1163 | 5.15E-06 |
| 83 | ENSG00000126562 | WNK4              | -1.31967 | 2.074  | 4.48E-05 |
| 84 | ENSG00000177303 | CASKIN2           | -1.32918 | 2.0119 | 1.97E-06 |
| 85 | ENSG00000169258 | GPRIN1            | -1.34077 | 2.5535 | 2.68E-09 |
| 86 | ENSG00000161847 | RAVER1            | -1.35497 | 2.1091 | 9.64E-07 |
| 87 | ENSG00000171824 | EXOSC10           | -1.36715 | 3.6313 | 7.30E-15 |
| 88 | ENSG00000115816 | CEBPZ             | -1.52237 | 3.6478 | 8.21E-17 |
| 89 | ENSG00000185567 | AHNAK2            | -1.52662 | 4.1079 | 2.61E-07 |
| 90 | ENSG00000196924 | FLNA              | -1.5298  | 7.9027 | 6.31E-07 |
| 91 | ENSG00000103549 | RNF40             | -1.65268 | 2.2308 | 1.62E-07 |
| 92 | ENSG00000184634 | MED12             | -1.67725 | 2.0901 | 3.35E-04 |
| 93 | ENSG00000270647 | TAF15             | -1.73698 | 4.3072 | 3.82E-27 |
| 94 | ENSG00000166477 | LEO1              | -1.74083 | 2.2756 | 2.85E-12 |
| 95 | ENSG00000137076 | TLN1              | -2.04626 | 4.7947 | 2.71E-07 |
| 96 | ENSG00000276168 | RN7SL1            | -2.49191 | 7.202  | 4.12E-02 |
| 97 | ENSG00000281181 | Novel transcript* | -3.51519 | 4.279  | 4.84E-03 |

\* Similar to YY1 associated myogenesis RNA 1 (YAM1)

**Table S3.** List of the 32 differentially expressed genes (29 up-regulated and 3 down-regulated) with FDR < 0.05 and absolute log<sub>2</sub> FC < -1 and > 1 at 24 hpi. The respective gene identifier, gene symbol, and log<sub>2</sub> FC are shown.

| No | Gene_ID         | Gene Symbol | Log <sub>2</sub> FC | logCPM  | FDR       |
|----|-----------------|-------------|---------------------|---------|-----------|
| 1  | ENSG00000100867 | DHRS2       | 4.65183             | 1.7045  | 3.08E-50  |
| 2  | ENSG00000128965 | CHAC1       | 2.48657             | 4.9748  | 1.10E-124 |
| 3  | ENSG00000163285 | GABRG1      | 2.44108             | 1.9422  | 4.69E-27  |
| 4  | ENSG00000197714 | ZNF460      | 1.84396             | 2.1093  | 4.17E-17  |
| 5  | ENSG00000140044 | JDP2        | 1.76444             | 2.0172  | 1.01E-15  |
| 6  | ENSG00000116761 | CTH         | 1.75532             | 3.9866  | 4.75E-50  |
| 7  | ENSG00000100889 | PCK2        | 1.68594             | 5.9132  | 3.21E-53  |
| 8  | ENSG00000168209 | DDIT4       | 1.55512             | 5.6838  | 8.35E-76  |
| 9  | ENSG00000136244 | IL6         | 1.46558             | 3.7312  | 5.53E-29  |
| 10 | ENSG00000198727 | MT-CYB      | 1.43822             | 12.1219 | 4.88E-87  |
| 11 | ENSG00000113739 | STC2        | 1.43145             | 6.9975  | 5.17E-79  |
| 12 | ENSG00000130766 | SESN2       | 1.4203              | 5.451   | 1.02E-50  |
| 13 | ENSG00000155961 | RAB39B      | 1.39579             | 2.7984  | 2.59E-13  |
| 14 | ENSG00000092621 | PHGDH       | 1.34029             | 8.8939  | 1.73E-48  |
| 15 | ENSG00000198712 | MT-CO2      | 1.29304             | 13.2035 | 2.90E-66  |
| 16 | ENSG00000211459 | MT-RNR1     | 1.20914             | 10.0489 | 2.87E-40  |
| 17 | ENSG00000166523 | CLEC4E      | 1.20752             | 3.1674  | 1.36E-14  |
| 18 | ENSG00000166123 | GPT2        | 1.15621             | 5.5721  | 5.87E-39  |
| 19 | ENSG00000248527 | MTATP6P1    | 1.1301              | 9.1762  | 4.40E-41  |
| 20 | ENSG00000136010 | ALDH1L2     | 1.1149              | 3.6345  | 2.26E-17  |
| 21 | ENSG00000114737 | CISH        | 1.08174             | 3.1206  | 8.14E-12  |
| 22 | ENSG00000143013 | LMO4        | 1.07914             | 5.5082  | 1.19E-38  |
| 23 | ENSG00000130707 | ASS1        | 1.07563             | 3.5248  | 1.68E-11  |
| 24 | ENSG00000137285 | TUBB2B      | 1.07022             | 2.2824  | 2.32E-07  |
| 25 | ENSG00000198886 | MT-ND4      | 1.06488             | 12.5677 | 6.24E-48  |
| 26 | ENSG00000181826 | RELL1       | 1.04415             | 3.1952  | 2.54E-08  |
| 27 | ENSG00000168003 | SLC3A2      | 1.03673             | 8.8154  | 1.57E-48  |
| 28 | ENSG00000146733 | PSPH        | 1.02513             | 6.7976  | 6.31E-39  |
| 29 | ENSG00000226243 | RPL37AP1    | 1.01279             | 2.5033  | 1.24E-06  |
| 30 | ENSG00000183287 | CCBE1       | -1.00718            | 2.2271  | 1.82E-06  |
| 31 | ENSG00000185567 | AHNAK2      | -1.00728            | 6.9849  | 4.92E-19  |
| 32 | ENSG00000118898 | PPL         | -1.36762            | 3.1399  | 4.11E-07  |



**Table S4.** List of the 404 differentially expressed genes (266 up-regulated and 138 down-regulated) with FDR < 0.05 and absolute log<sub>2</sub> FC < -1 and > 1 at 48 hpi. The respective gene identifier, gene symbol, and log<sub>2</sub> FC are shown.

| No | Gene_ID         | Gene Symbol | Log <sub>2</sub> FC | logCPM   | FDR       |
|----|-----------------|-------------|---------------------|----------|-----------|
| 1  | ENSG00000119508 | NR4A3       | 4.89913             | -0.33582 | 8.65E-13  |
| 2  | ENSG00000169429 | CXCL8       | 4.59705             | 5.34506  | 1.92E-94  |
| 3  | ENSG00000210082 | MT-RNR2     | 4.53753             | 16.12291 | 2.57E-95  |
| 4  | ENSG00000136244 | IL6         | 4.38098             | 4.66175  | 6.07E-114 |
| 5  | ENSG00000210196 | MT-TP       | 3.42679             | 9.33521  | 5.04E-60  |
| 6  | ENSG00000198938 | MT-CO3      | 3.39538             | 16.17062 | 1.31E-48  |
| 7  | ENSG00000198712 | MT-CO2      | 3.38562             | 15.51201 | 8.21E-52  |
| 8  | ENSG00000162772 | ATF3        | 2.98378             | 3.03837  | 2.44E-30  |
| 9  | ENSG00000247627 | MTND4P12    | 2.69148             | 1.28943  | 3.15E-08  |
| 10 | ENSG00000228253 | MT-ATP8     | 2.6104              | 9.64426  | 7.98E-80  |
| 11 | ENSG00000163661 | PTX3        | 2.59511             | 1.61938  | 1.34E-09  |
| 12 | ENSG00000229344 | MTCO2P12    | 2.58733             | 1.19358  | 4.97E-04  |
| 13 | ENSG00000128965 | CHAC1       | 2.43574             | 3.22514  | 7.63E-20  |
| 14 | ENSG00000173227 | SYT12       | 2.31066             | 1.58128  | 3.11E-06  |
| 15 | ENSG00000148926 | ADM         | 2.24294             | 2.93426  | 8.18E-12  |
| 16 | ENSG00000242299 | AC073861.1  | 2.12022             | 6.41751  | 5.62E-37  |
| 17 | ENSG00000117318 | ID3         | 2.10306             | 7.02857  | 4.65E-44  |
| 18 | ENSG00000198804 | MT-CO1      | 2.0901              | 15.76861 | 2.83E-18  |
| 19 | ENSG00000059804 | SLC2A3      | 2.08677             | 5.59203  | 3.26E-29  |
| 20 | ENSG00000169242 | EFNA1       | 2.07474             | 5.71657  | 7.27E-27  |
| 21 | ENSG00000146678 | IGFBP1      | 2.05227             | 2.44498  | 3.66E-07  |
| 22 | ENSG00000168209 | DDIT4       | 2.05143             | 5.16872  | 6.45E-29  |
| 23 | ENSG00000205763 | RP9P        | 2.04257             | 1.87286  | 1.90E-06  |
| 24 | ENSG00000123496 | IL13RA2     | 2.01459             | 2.23936  | 6.44E-05  |
| 25 | ENSG00000100906 | NFKBIA      | 2.00889             | 5.5154   | 1.84E-29  |
| 26 | ENSG00000073756 | PTGS2       | 2.00233             | 1.76798  | 1.13E-05  |
| 27 | ENSG00000276168 | RN7SL1      | 1.99372             | 2.55734  | 2.56E-08  |
| 28 | ENSG00000136826 | KLF4        | 1.98868             | 2.4373   | 2.26E-08  |
| 29 | ENSG00000107984 | DKK1        | 1.97681             | 3.04423  | 1.15E-10  |
| 30 | ENSG00000213741 | RPS29       | 1.91322             | 9.02634  | 4.59E-41  |
| 31 | ENSG00000177410 | ZFAS1       | 1.90158             | 5.84273  | 2.47E-33  |
| 32 | ENSG00000234335 | RPS4XP11    | 1.89987             | 1.36023  | 3.56E-04  |
| 33 | ENSG00000226243 | RPL37AP1    | 1.8719              | 2.1734   | 3.66E-06  |
| 34 | ENSG00000171858 | RPS21       | 1.87049             | 10.04098 | 7.45E-38  |
| 35 | ENSG00000170634 | ACYP2       | 1.86873             | 1.82501  | 5.80E-05  |
| 36 | ENSG00000132432 | SEC61G      | 1.86872             | 6.8668   | 9.11E-33  |
| 37 | ENSG00000134419 | RPS15A      | 1.85781             | 6.83867  | 1.37E-38  |
| 38 | ENSG00000141682 | PMAIP1      | 1.85673             | 6.02808  | 2.72E-28  |

|    |                 |             |         |          |          |
|----|-----------------|-------------|---------|----------|----------|
| 39 | ENSG00000235174 | RPL39P3     | 1.84731 | 5.91713  | 6.51E-29 |
| 40 | ENSG00000145592 | RPL37       | 1.8202  | 10.49067 | 9.50E-42 |
| 41 | ENSG00000233016 | SNHG7       | 1.81465 | 3.02129  | 2.70E-08 |
| 42 | ENSG00000110700 | RPS13       | 1.81288 | 9.94619  | 2.03E-36 |
| 43 | ENSG00000251495 | PPIAP11     | 1.80555 | 1.87756  | 1.13E-04 |
| 44 | ENSG00000212664 | AC064799.1  | 1.79487 | 1.93587  | 6.41E-05 |
| 45 | ENSG00000008988 | RPS20       | 1.78385 | 10.22783 | 6.16E-36 |
| 46 | ENSG00000061656 | SPAG4       | 1.76559 | 2.54807  | 9.43E-07 |
| 47 | ENSG00000133112 | TPT1        | 1.74132 | 9.85153  | 3.99E-33 |
| 48 | ENSG00000068028 | RASSF1      | 1.73965 | 2.19747  | 8.37E-05 |
| 49 | ENSG00000164761 | TNFRSF11B   | 1.73698 | 2.87235  | 1.66E-07 |
| 50 | ENSG00000181826 | RELL1       | 1.73342 | 2.76074  | 2.64E-07 |
| 51 | ENSG00000071082 | RPL31       | 1.73017 | 9.94803  | 1.80E-38 |
| 52 | ENSG00000274276 | CBSL        | 1.69739 | 2.35854  | 3.63E-03 |
| 53 | ENSG00000177954 | RPS27       | 1.67064 | 10.12355 | 4.78E-37 |
| 54 | ENSG00000255717 | SNHG1       | 1.66369 | 5.2712   | 8.67E-18 |
| 55 | ENSG00000121039 | RDH10       | 1.65994 | 1.84928  | 1.15E-03 |
| 56 | ENSG00000163682 | RPL9        | 1.65123 | 9.68254  | 1.74E-34 |
| 57 | ENSG00000237550 | RPL9P9      | 1.64282 | 8.97003  | 3.50E-25 |
| 58 | ENSG00000101132 | PFDN4       | 1.63264 | 6.259    | 5.80E-23 |
| 59 | ENSG00000269293 | ZSCAN16-AS1 | 1.61453 | 1.71323  | 1.70E-03 |
| 60 | ENSG00000227615 | AP001324.1  | 1.61181 | 5.39334  | 2.31E-17 |
| 61 | ENSG00000166441 | RPL27A      | 1.61044 | 10.27831 | 3.52E-30 |
| 62 | ENSG00000182899 | RPL35A      | 1.57163 | 9.72963  | 1.04E-29 |
| 63 | ENSG00000218426 | AL590867.2  | 1.56681 | 5.41114  | 2.68E-13 |
| 64 | ENSG00000250321 | AC079140.2  | 1.55754 | 2.46534  | 5.38E-05 |
| 65 | ENSG00000108590 | MED31       | 1.55445 | 1.8765   | 1.65E-03 |
| 66 | ENSG00000114942 | EEF1B2      | 1.54934 | 9.33113  | 1.67E-27 |
| 67 | ENSG00000217716 | RPS10P3     | 1.5483  | 2.18057  | 4.54E-04 |
| 68 | ENSG00000113739 | STC2        | 1.53535 | 5.79083  | 2.16E-21 |
| 69 | ENSG00000118181 | RPS25       | 1.53152 | 9.92922  | 4.84E-29 |
| 70 | ENSG00000244128 | LINC01322   | 1.51806 | 2.15835  | 8.85E-04 |
| 71 | ENSG00000126756 | UXT         | 1.51489 | 6.21119  | 1.19E-20 |
| 72 | ENSG00000228589 | SPCS2P4     | 1.51038 | 3.13171  | 6.36E-05 |
| 73 | ENSG00000237296 | SMG1P1      | 1.50832 | 2.01957  | 1.54E-03 |
| 74 | ENSG00000229117 | RPL41       | 1.5052  | 10.20359 | 1.83E-33 |
| 75 | ENSG00000166741 | NNMT        | 1.50171 | 6.76693  | 1.12E-25 |
| 76 | ENSG00000177600 | RPLP2       | 1.49945 | 9.54988  | 7.02E-28 |
| 77 | ENSG00000185834 | RPL12P4     | 1.49551 | 2.35525  | 2.71E-04 |
| 78 | ENSG00000125691 | RPL23       | 1.47056 | 10.232   | 6.36E-30 |
| 79 | ENSG00000240036 | AC104563.1  | 1.46506 | 1.8935   | 3.53E-03 |
| 80 | ENSG00000188243 | COMMD6      | 1.46414 | 6.03248  | 1.11E-20 |

|     |                 |            |         |          |          |
|-----|-----------------|------------|---------|----------|----------|
| 81  | ENSG00000263266 | RPS7P1     | 1.45603 | 6.51821  | 1.92E-19 |
| 82  | ENSG00000145425 | RPS3A      | 1.45495 | 9.47059  | 9.71E-30 |
| 83  | ENSG00000243927 | MRPS6      | 1.453   | 5.69047  | 3.02E-16 |
| 84  | ENSG00000113811 | SELENOK    | 1.4505  | 5.42095  | 4.05E-16 |
| 85  | ENSG00000166136 | NDUFB8     | 1.4471  | 2.26391  | 9.23E-04 |
| 86  | ENSG00000178381 | ZFAND2A    | 1.44058 | 2.5215   | 2.28E-04 |
| 87  | ENSG00000137955 | RABGGTB    | 1.43937 | 6.13734  | 6.34E-18 |
| 88  | ENSG00000240395 | RPL5P23    | 1.43419 | 2.27483  | 8.46E-04 |
| 89  | ENSG00000237991 | RPL35P1    | 1.43052 | 2.08439  | 2.15E-03 |
| 90  | ENSG00000149196 | HIKESHI    | 1.43032 | 6.10318  | 1.92E-12 |
| 91  | ENSG00000119048 | UBE2B      | 1.43026 | 5.60463  | 9.95E-15 |
| 92  | ENSG00000120833 | SOCS2      | 1.42946 | 5.95166  | 1.40E-17 |
| 93  | ENSG00000172809 | RPL38      | 1.42837 | 9.19553  | 3.48E-25 |
| 94  | ENSG00000007255 | TRAPPC6A   | 1.42473 | 2.23321  | 2.77E-03 |
| 95  | ENSG00000170222 | ADPRM      | 1.42331 | 2.57118  | 7.50E-04 |
| 96  | ENSG00000244313 | AC024293.1 | 1.42217 | 6.51997  | 1.68E-15 |
| 97  | ENSG00000230453 | ANKRD18B   | 1.41729 | 1.69466  | 1.99E-02 |
| 98  | ENSG00000235508 | RPS2P7     | 1.4171  | 1.98911  | 3.66E-03 |
| 99  | ENSG00000111696 | NT5DC3     | 1.41705 | 1.81656  | 5.60E-03 |
| 100 | ENSG00000162599 | NFIA       | 1.41609 | 2.09689  | 1.73E-03 |
| 101 | ENSG00000111907 | TPD52L1    | 1.41509 | 1.93619  | 4.14E-03 |
| 102 | ENSG00000164919 | COX6C      | 1.41497 | 5.87041  | 3.40E-17 |
| 103 | ENSG00000214784 | AC010468.1 | 1.41233 | 2.19936  | 1.63E-03 |
| 104 | ENSG00000226259 | GTF2H2B    | 1.41138 | 2.38165  | 9.82E-04 |
| 105 | ENSG00000135919 | SERPINE2   | 1.4085  | 5.86105  | 4.22E-16 |
| 106 | ENSG00000095303 | PTGS1      | 1.40545 | 2.38803  | 1.06E-03 |
| 107 | ENSG00000184924 | PTRHD1     | 1.39787 | 2.39369  | 9.07E-04 |
| 108 | ENSG00000234797 | RPS3AP6    | 1.37828 | 5.74887  | 1.40E-15 |
| 109 | ENSG00000164136 | IL15       | 1.37442 | 2.0254   | 4.23E-03 |
| 110 | ENSG00000279483 | AC090498.1 | 1.37263 | 2.01407  | 1.76E-02 |
| 111 | ENSG00000168894 | RNF181     | 1.35895 | 5.9266   | 2.68E-16 |
| 112 | ENSG00000226360 | RPL10AP6   | 1.35773 | 2.84243  | 1.90E-04 |
| 113 | ENSG00000247516 | MIR4458HG  | 1.35396 | 2.63236  | 4.39E-04 |
| 114 | ENSG00000142676 | RPL11      | 1.35096 | 10.04078 | 7.02E-25 |
| 115 | ENSG00000212802 | RPL15P3    | 1.35081 | 6.56595  | 1.28E-17 |
| 116 | ENSG00000131979 | GCH1       | 1.34895 | 2.59808  | 4.21E-04 |
| 117 | ENSG00000143543 | JTB        | 1.34357 | 2.91921  | 9.11E-05 |
| 118 | ENSG00000114125 | RNF7       | 1.34337 | 5.43317  | 6.12E-13 |
| 119 | ENSG00000171223 | JUNB       | 1.34317 | 2.8867   | 1.39E-04 |
| 120 | ENSG00000183298 | RPSAP19    | 1.33368 | 6.05997  | 1.06E-14 |
| 121 | ENSG00000171863 | RPS7       | 1.33307 | 9.54279  | 1.34E-20 |
| 122 | ENSG00000254612 | AP001000.1 | 1.32937 | 3.10942  | 1.98E-04 |

|     |                 |            |         |          |          |
|-----|-----------------|------------|---------|----------|----------|
| 123 | ENSG00000170889 | RPS9       | 1.31168 | 9.97012  | 4.94E-21 |
| 124 | ENSG00000163882 | POLR2H     | 1.31154 | 6.30448  | 5.97E-15 |
| 125 | ENSG00000175193 | PARL       | 1.30918 | 2.46662  | 1.90E-03 |
| 126 | ENSG00000109099 | PMP22      | 1.30715 | 2.9155   | 1.89E-04 |
| 127 | ENSG00000117877 | CD3EAP     | 1.30521 | 2.1912   | 6.52E-03 |
| 128 | ENSG00000176171 | BNIP3      | 1.30217 | 6.23416  | 2.21E-11 |
| 129 | ENSG00000167550 | RHEBL1     | 1.29991 | 2.55841  | 2.41E-03 |
| 130 | ENSG00000242951 | AC007182.2 | 1.29986 | 2.51509  | 2.38E-03 |
| 131 | ENSG00000138326 | RPS24      | 1.29575 | 10.05311 | 1.76E-21 |
| 132 | ENSG00000180211 | FO393411.1 | 1.29532 | 2.64156  | 8.97E-04 |
| 133 | ENSG00000180354 | MTURN      | 1.29087 | 2.96072  | 3.26E-04 |
| 134 | ENSG00000107833 | NPM3       | 1.28423 | 6.30854  | 3.02E-16 |
| 135 | ENSG00000249859 | PVT1       | 1.27954 | 2.93605  | 1.01E-03 |
| 136 | ENSG00000216866 | RPS2P55    | 1.27862 | 2.83869  | 6.03E-04 |
| 137 | ENSG00000178458 | H3F3AP6    | 1.27688 | 2.73159  | 1.01E-03 |
| 138 | ENSG00000114391 | RPL24      | 1.27331 | 9.64454  | 6.57E-19 |
| 139 | ENSG00000229644 | NAMPTP1    | 1.2715  | 2.26877  | 5.56E-03 |
| 140 | ENSG00000198625 | MDM4       | 1.26611 | 2.54466  | 1.61E-03 |
| 141 | ENSG00000171421 | MRPL36     | 1.26329 | 5.62336  | 7.41E-11 |
| 142 | ENSG00000153822 | KCNJ16     | 1.26086 | 2.22576  | 7.26E-03 |
| 143 | ENSG00000181061 | HIGD1A     | 1.25942 | 6.47214  | 8.20E-14 |
| 144 | ENSG00000198856 | OSTC       | 1.25425 | 6.48572  | 3.57E-15 |
| 145 | ENSG00000138166 | DUSP5      | 1.25098 | 5.8367   | 2.68E-13 |
| 146 | ENSG00000185088 | RPS27L     | 1.25038 | 5.60456  | 8.32E-11 |
| 147 | ENSG00000117691 | NENF       | 1.24792 | 6.48416  | 5.73E-17 |
| 148 | ENSG00000166710 | B2M        | 1.24734 | 9.19999  | 1.01E-20 |
| 149 | ENSG00000164615 | CAMLG      | 1.24663 | 6.0483   | 9.80E-10 |
| 150 | ENSG00000004779 | NDUFAB1    | 1.2354  | 5.70947  | 2.49E-10 |
| 151 | ENSG00000139289 | PHLDA1     | 1.23143 | 6.43166  | 1.87E-16 |
| 152 | ENSG00000185022 | MAFF       | 1.23022 | 2.91175  | 4.94E-04 |
| 153 | ENSG00000235912 | AL031729.1 | 1.229   | 2.09241  | 1.25E-02 |
| 154 | ENSG00000213189 | BTF3L4P2   | 1.22828 | 2.69774  | 3.20E-03 |
| 155 | ENSG00000100387 | RBX1       | 1.2269  | 6.50946  | 5.55E-14 |
| 156 | ENSG00000100292 | HMOX1      | 1.22427 | 6.60971  | 3.51E-16 |
| 157 | ENSG00000104231 | ZFAND1     | 1.22356 | 5.48885  | 1.68E-10 |
| 158 | ENSG00000229180 | AC006001.3 | 1.22305 | 2.95285  | 6.05E-04 |
| 159 | ENSG00000198818 | SFT2D1     | 1.21872 | 5.92082  | 2.55E-12 |
| 160 | ENSG00000015133 | CCDC88C    | 1.21726 | 2.45585  | 4.94E-03 |
| 161 | ENSG00000125726 | CD70       | 1.21671 | 5.62274  | 3.30E-11 |
| 162 | ENSG00000224631 | RPS27AP16  | 1.21467 | 5.54977  | 5.66E-10 |
| 163 | ENSG00000198258 | UBL5       | 1.21187 | 6.53833  | 7.09E-16 |
| 164 | ENSG00000166295 | ANAPC16    | 1.21083 | 5.84694  | 1.06E-13 |

|     |                 |            |         |         |          |
|-----|-----------------|------------|---------|---------|----------|
| 165 | ENSG00000109220 | CHIC2      | 1.20546 | 2.11081 | 1.61E-02 |
| 166 | ENSG00000178464 | RPL10P16   | 1.19782 | 5.61995 | 6.72E-10 |
| 167 | ENSG00000128699 | ORMDL1     | 1.19433 | 5.52126 | 2.41E-11 |
| 168 | ENSG00000217130 | AL139100.1 | 1.19389 | 2.6846  | 5.35E-03 |
| 169 | ENSG00000117543 | DPH5       | 1.19086 | 5.81231 | 1.10E-10 |
| 170 | ENSG00000166595 | FAM96B     | 1.18792 | 5.96022 | 8.32E-12 |
| 171 | ENSG00000136942 | RPL35      | 1.17717 | 9.6819  | 2.87E-15 |
| 172 | ENSG00000114023 | FAM162A    | 1.17514 | 5.54065 | 9.87E-10 |
| 173 | ENSG00000149716 | ORAOV1     | 1.16802 | 2.45022 | 8.43E-03 |
| 174 | ENSG00000161970 | RPL26      | 1.16646 | 5.49443 | 3.06E-10 |
| 175 | ENSG00000244716 | BX679664.3 | 1.16576 | 6.45259 | 4.92E-12 |
| 176 | ENSG00000161980 | POLR3K     | 1.16329 | 2.82673 | 2.36E-03 |
| 177 | ENSG00000189068 | VSTM1      | 1.16302 | 2.81974 | 7.10E-03 |
| 178 | ENSG00000166002 | SMCO4      | 1.1624  | 1.96861 | 2.48E-02 |
| 179 | ENSG00000090266 | NDUFB2     | 1.16159 | 5.8288  | 7.87E-12 |
| 180 | ENSG00000137970 | RPL7P9     | 1.16124 | 6.28687 | 2.05E-11 |
| 181 | ENSG00000138085 | ATRAID     | 1.15573 | 5.62013 | 6.68E-10 |
| 182 | ENSG00000100814 | CCNB1IP1   | 1.15523 | 5.64529 | 1.69E-09 |
| 183 | ENSG00000165996 | HACD1      | 1.15131 | 2.64086 | 5.51E-03 |
| 184 | ENSG00000181524 | RPL24P4    | 1.14999 | 6.01147 | 4.00E-13 |
| 185 | ENSG00000165264 | NDUFB6     | 1.14871 | 5.70898 | 5.34E-09 |
| 186 | ENSG00000117569 | PTBP2      | 1.14821 | 2.37142 | 1.18E-02 |
| 187 | ENSG00000090263 | MRPS33     | 1.14404 | 6.12557 | 2.34E-11 |
| 188 | ENSG00000167397 | VKORC1     | 1.14363 | 2.60412 | 5.33E-03 |
| 189 | ENSG00000253683 | AC027309.2 | 1.1409  | 2.56218 | 7.97E-03 |
| 190 | ENSG00000169740 | ZNF32      | 1.13459 | 2.77519 | 4.05E-03 |
| 191 | ENSG00000136888 | ATP6V1G1   | 1.13078 | 6.54966 | 2.80E-13 |
| 192 | ENSG00000104432 | IL7        | 1.12846 | 1.86251 | 4.60E-02 |
| 193 | ENSG00000226210 | AC215219.1 | 1.12828 | 2.65721 | 9.17E-03 |
| 194 | ENSG00000233762 | AC007969.1 | 1.12741 | 5.83028 | 3.07E-11 |
| 195 | ENSG00000143256 | PFDN2      | 1.12564 | 5.77719 | 1.69E-10 |
| 196 | ENSG00000131871 | SELENOS    | 1.12534 | 5.49809 | 6.64E-10 |
| 197 | ENSG00000142188 | TMEM50B    | 1.1253  | 6.2566  | 7.96E-13 |
| 198 | ENSG00000129235 | TXNDC17    | 1.124   | 6.54108 | 2.95E-11 |
| 199 | ENSG00000175305 | CCNE2      | 1.124   | 2.12231 | 2.53E-02 |
| 200 | ENSG00000119820 | YIPF4      | 1.12291 | 5.67827 | 4.30E-10 |
| 201 | ENSG00000217241 | CBX3P9     | 1.12166 | 2.12514 | 2.72E-02 |
| 202 | ENSG00000198755 | RPL10A     | 1.12078 | 9.63095 | 2.49E-17 |
| 203 | ENSG00000276023 | DUSP14     | 1.11736 | 5.47386 | 3.79E-09 |
| 204 | ENSG00000134049 | IER3IP1    | 1.11621 | 5.64982 | 3.84E-10 |
| 205 | ENSG00000237506 | RPSAP15    | 1.11605 | 5.39099 | 2.87E-07 |
| 206 | ENSG00000164405 | UQCRQ      | 1.116   | 6.47321 | 2.28E-12 |



|     |                 |           |         |         |          |
|-----|-----------------|-----------|---------|---------|----------|
| 207 | ENSG00000175309 | PHYKPL    | 1.1077  | 2.79837 | 1.55E-02 |
| 208 | ENSG00000225178 | RPSAP58   | 1.10524 | 6.22263 | 1.29E-10 |
| 209 | ENSG00000183527 | PSMG1     | 1.10443 | 5.75964 | 8.98E-09 |
| 210 | ENSG00000034713 | GABARAPL2 | 1.09819 | 5.88266 | 6.21E-10 |
| 211 | ENSG00000171735 | CAMTA1    | 1.09706 | 5.71952 | 4.07E-09 |
| 212 | ENSG00000233270 | SNRPEP4   | 1.09512 | 2.20507 | 2.77E-02 |
| 213 | ENSG00000119013 | NDUFB3    | 1.09443 | 6.09524 | 9.70E-08 |
| 214 | ENSG00000105829 | BET1      | 1.09182 | 5.6695  | 1.06E-08 |
| 215 | ENSG00000175197 | DDIT3     | 1.09054 | 2.08942 | 4.31E-02 |
| 216 | ENSG00000268942 | CKS1BP3   | 1.08965 | 1.96215 | 4.95E-02 |
| 217 | ENSG00000120910 | PPP3CC    | 1.08946 | 2.95951 | 7.03E-03 |
| 218 | ENSG00000214253 | FIS1      | 1.08864 | 5.8593  | 1.81E-09 |
| 219 | ENSG00000240342 | RPS2P5    | 1.08788 | 9.65924 | 1.11E-13 |
| 220 | ENSG00000092841 | MYL6      | 1.08669 | 9.11725 | 2.48E-12 |
| 221 | ENSG00000184227 | ACOT1     | 1.08628 | 1.96785 | 4.45E-02 |
| 222 | ENSG00000186468 | RPS23     | 1.08262 | 6.41027 | 4.76E-13 |
| 223 | ENSG00000134153 | EMC7      | 1.0787  | 5.69171 | 4.38E-08 |
| 224 | ENSG00000169684 | CHRNA5    | 1.07745 | 2.43018 | 1.80E-02 |
| 225 | ENSG00000179046 | TRIML2    | 1.07489 | 2.66131 | 2.58E-02 |
| 226 | ENSG00000088451 | TGDS      | 1.0734  | 3.00841 | 3.55E-03 |
| 227 | ENSG00000249264 | EEF1A1P9  | 1.07109 | 2.10823 | 3.11E-02 |
| 228 | ENSG00000172428 | COPS9     | 1.0704  | 5.4273  | 2.73E-07 |
| 229 | ENSG00000099337 | KCNK6     | 1.06923 | 2.62179 | 1.52E-02 |
| 230 | ENSG00000132773 | TOE1      | 1.06564 | 2.86968 | 5.72E-03 |
| 231 | ENSG00000118680 | MYL12B    | 1.06473 | 9.21421 | 8.65E-16 |
| 232 | ENSG00000092208 | GEMIN2    | 1.0645  | 2.79241 | 1.03E-02 |
| 233 | ENSG00000134758 | RNF138    | 1.06391 | 5.61266 | 9.55E-09 |
| 234 | ENSG00000183696 | UPP1      | 1.0626  | 6.58322 | 2.02E-11 |
| 235 | ENSG00000214485 | RPL7P1    | 1.05909 | 6.41836 | 1.55E-10 |
| 236 | ENSG00000166342 | NETO1     | 1.05562 | 2.23799 | 3.07E-02 |
| 237 | ENSG00000115738 | ID2       | 1.05474 | 2.05982 | 4.53E-02 |
| 238 | ENSG00000153879 | CEBPG     | 1.0533  | 5.62603 | 3.47E-09 |
| 239 | ENSG00000112110 | MRPL18    | 1.04919 | 6.4726  | 3.86E-10 |
| 240 | ENSG00000122884 | P4HA1     | 1.04842 | 5.74025 | 3.54E-08 |
| 241 | ENSG00000123131 | PRDX4     | 1.04005 | 6.5192  | 5.74E-10 |
| 242 | ENSG00000160131 | VMA21     | 1.03987 | 5.91528 | 3.36E-10 |
| 243 | ENSG00000167863 | ATP5PD    | 1.03919 | 6.51217 | 3.15E-12 |
| 244 | ENSG00000143727 | ACP1      | 1.03909 | 6.11405 | 1.11E-09 |
| 245 | ENSG00000146425 | DYNLT1    | 1.03887 | 5.54414 | 6.24E-08 |
| 246 | ENSG00000146386 | ABRACL    | 1.0332  | 5.94265 | 1.34E-08 |
| 247 | ENSG00000074935 | TUBE1     | 1.03314 | 2.89581 | 9.83E-03 |
| 248 | ENSG00000126709 | IFI6      | 1.03175 | 2.61149 | 1.42E-02 |

|     |                 |           |          |         |          |
|-----|-----------------|-----------|----------|---------|----------|
| 249 | ENSG00000163923 | RPL39L    | 1.03134  | 3.00706 | 6.54E-03 |
| 250 | ENSG00000186184 | POLR1D    | 1.02985  | 5.80849 | 7.70E-08 |
| 251 | ENSG00000181634 | TNFSF15   | 1.02836  | 2.90221 | 8.99E-03 |
| 252 | ENSG00000148444 | COMMD3    | 1.02745  | 2.5636  | 3.59E-02 |
| 253 | ENSG00000164885 | CDK5      | 1.02725  | 5.51204 | 9.56E-07 |
| 254 | ENSG00000242071 | RPL7AP6   | 1.02348  | 5.81947 | 4.01E-08 |
| 255 | ENSG00000147687 | TATDN1    | 1.02316  | 5.45534 | 2.21E-07 |
| 256 | ENSG00000228502 | EEF1A1P11 | 1.02164  | 2.4281  | 2.60E-02 |
| 257 | ENSG00000185917 | SETD4     | 1.02116  | 2.08847 | 4.88E-02 |
| 258 | ENSG00000147669 | POLR2K    | 1.01835  | 6.20378 | 5.55E-08 |
| 259 | ENSG00000124733 | MEA1      | 1.01535  | 5.48494 | 8.16E-07 |
| 260 | ENSG00000150459 | SAP18     | 1.01455  | 6.562   | 1.43E-10 |
| 261 | ENSG00000051620 | HEBP2     | 1.0129   | 6.38065 | 8.72E-11 |
| 262 | ENSG00000000419 | DPM1      | 1.00788  | 5.79092 | 2.72E-08 |
| 263 | ENSG00000224831 | TMEM183B  | 1.00708  | 2.87861 | 1.49E-02 |
| 264 | ENSG00000172159 | FRMD3     | 1.00567  | 2.71823 | 2.52E-02 |
| 265 | ENSG00000162244 | RPL29     | 1.00034  | 9.52484 | 7.31E-14 |
| 266 | ENSG00000106701 | FSD1L     | 1.00025  | 2.22818 | 4.72E-02 |
| 267 | ENSG00000165406 | MARCH8    | -1.00131 | 5.03431 | 6.66E-05 |
| 268 | ENSG00000077235 | GTF3C1    | -1.00352 | 5.54313 | 2.42E-05 |
| 269 | ENSG00000175970 | UNC119B   | -1.00606 | 4.17005 | 3.66E-03 |
| 270 | ENSG00000196935 | SRGAP1    | -1.00611 | 4.26205 | 4.52E-03 |
| 271 | ENSG00000151208 | DLG5      | -1.00953 | 4.76984 | 5.42E-04 |
| 272 | ENSG00000184640 | SEPT9     | -1.00988 | 7.4498  | 9.78E-11 |
| 273 | ENSG00000115884 | SDC1      | -1.01142 | 5.32952 | 4.10E-05 |
| 274 | ENSG00000166016 | ABTB2     | -1.01203 | 4.91491 | 1.67E-04 |
| 275 | ENSG00000106261 | ZKSCAN1   | -1.0147  | 5.33168 | 2.85E-04 |
| 276 | ENSG00000187239 | FNBP1     | -1.01695 | 4.08259 | 5.61E-03 |
| 277 | ENSG00000100109 | TFIP11    | -1.03669 | 4.14906 | 3.53E-03 |
| 278 | ENSG00000178691 | SUZ12     | -1.04206 | 5.31302 | 2.86E-05 |
| 279 | ENSG00000130816 | DNMT1     | -1.04339 | 5.37542 | 1.35E-04 |
| 280 | ENSG00000197386 | HTT       | -1.04846 | 5.56075 | 5.54E-06 |
| 281 | ENSG00000138119 | MYOF      | -1.04949 | 7.35867 | 5.07E-08 |
| 282 | ENSG00000087087 | SRRT      | -1.05546 | 5.32371 | 8.29E-06 |
| 283 | ENSG00000064012 | CASP8     | -1.05857 | 4.34834 | 1.01E-03 |
| 284 | ENSG00000019144 | PHLDB1    | -1.05942 | 4.30702 | 1.90E-03 |
| 285 | ENSG00000275066 | SYNRG     | -1.06015 | 4.78132 | 2.59E-04 |
| 286 | ENSG00000100393 | EP300     | -1.0637  | 5.41088 | 1.63E-04 |
| 287 | ENSG00000187189 | TSPYL4    | -1.06397 | 4.26597 | 1.52E-03 |
| 288 | ENSG00000204569 | PPP1R10   | -1.06485 | 5.18091 | 1.51E-05 |
| 289 | ENSG00000140750 | ARHGAP17  | -1.06587 | 4.31248 | 1.35E-03 |
| 290 | ENSG00000130589 | HELZ2     | -1.07397 | 5.35852 | 7.28E-06 |

|     |                 |          |          |         |          |
|-----|-----------------|----------|----------|---------|----------|
| 291 | ENSG00000080986 | NDC80    | -1.07549 | 4.99405 | 8.55E-05 |
| 292 | ENSG00000143374 | TARS2    | -1.08204 | 4.63649 | 2.03E-04 |
| 293 | ENSG00000166974 | MAPRE2   | -1.08601 | 4.23852 | 1.26E-03 |
| 294 | ENSG00000147475 | ERLIN2   | -1.08873 | 4.86435 | 4.98E-05 |
| 295 | ENSG00000013288 | MAN2B2   | -1.08904 | 4.53671 | 2.02E-03 |
| 296 | ENSG00000184602 | SNN      | -1.09283 | 5.00703 | 1.73E-05 |
| 297 | ENSG00000108557 | RAI1     | -1.09333 | 4.53819 | 6.08E-04 |
| 298 | ENSG00000128829 | EIF2AK4  | -1.10052 | 5.09041 | 1.61E-05 |
| 299 | ENSG00000197603 | C5orf42  | -1.10133 | 4.05225 | 5.60E-03 |
| 300 | ENSG00000161847 | RAVER1   | -1.1017  | 4.2519  | 9.90E-04 |
| 301 | ENSG00000085185 | BCORL1   | -1.10208 | 4.78512 | 2.86E-04 |
| 302 | ENSG00000151929 | BAG3     | -1.10833 | 4.39114 | 4.67E-04 |
| 303 | ENSG00000103111 | MON1B    | -1.11877 | 4.88897 | 3.10E-05 |
| 304 | ENSG00000136861 | CDK5RAP2 | -1.1257  | 4.56652 | 6.55E-04 |
| 305 | ENSG00000275410 | HNF1B    | -1.1293  | 5.36249 | 1.89E-05 |
| 306 | ENSG00000198742 | SMURF1   | -1.13608 | 4.90365 | 2.48E-05 |
| 307 | ENSG00000140320 | BAHD1    | -1.13873 | 4.13557 | 1.13E-03 |
| 308 | ENSG00000149930 | TAOK2    | -1.14169 | 4.41958 | 3.94E-04 |
| 309 | ENSG00000123080 | CDKN2C   | -1.15037 | 4.50798 | 1.71E-04 |
| 310 | ENSG00000106290 | TAF6     | -1.15114 | 5.57154 | 1.99E-07 |
| 311 | ENSG00000180340 | FZD2     | -1.15213 | 4.94552 | 1.17E-05 |
| 312 | ENSG00000008300 | CELSR3   | -1.15351 | 4.54972 | 1.89E-04 |
| 313 | ENSG00000088899 | LZTS3    | -1.15724 | 4.09836 | 1.17E-03 |
| 314 | ENSG00000129116 | PALLD    | -1.16242 | 4.30348 | 4.91E-04 |
| 315 | ENSG00000167447 | SMG8     | -1.17446 | 4.11319 | 8.28E-04 |
| 316 | ENSG00000275832 | ARHGAP23 | -1.18251 | 5.13211 | 5.99E-06 |
| 317 | ENSG00000204388 | HSPA1B   | -1.18485 | 4.49775 | 2.10E-04 |
| 318 | ENSG00000100311 | PDGFB    | -1.19487 | 5.26168 | 1.86E-06 |
| 319 | ENSG00000120800 | UTP20    | -1.19613 | 4.46581 | 2.16E-04 |
| 320 | ENSG00000088367 | EPB41L1  | -1.19719 | 4.18602 | 5.94E-04 |
| 321 | ENSG00000116128 | BCL9     | -1.1979  | 4.38002 | 2.59E-04 |
| 322 | ENSG00000107882 | SUFU     | -1.19826 | 4.18662 | 5.63E-04 |
| 323 | ENSG00000141447 | OSBPL1A  | -1.19979 | 4.86565 | 1.34E-05 |
| 324 | ENSG00000010292 | NCAPD2   | -1.20468 | 7.94443 | 1.29E-14 |
| 325 | ENSG00000105287 | PRKD2    | -1.20756 | 5.3405  | 6.51E-07 |
| 326 | ENSG00000136715 | SAP130   | -1.21527 | 4.52286 | 6.74E-05 |
| 327 | ENSG00000143624 | INTS3    | -1.21771 | 4.64168 | 4.28E-05 |
| 328 | ENSG00000143515 | ATP8B2   | -1.21977 | 4.75258 | 7.34E-05 |
| 329 | ENSG00000117115 | PADI2    | -1.22249 | 7.86466 | 1.11E-14 |
| 330 | ENSG00000127585 | FBXL16   | -1.23025 | 4.85985 | 1.13E-05 |
| 331 | ENSG00000166750 | SLFN5    | -1.23176 | 4.76255 | 7.02E-05 |
| 332 | ENSG00000196182 | STK40    | -1.23676 | 4.21983 | 2.85E-04 |

|     |                 |           |          |         |          |
|-----|-----------------|-----------|----------|---------|----------|
| 333 | ENSG00000186834 | HEXIM1    | -1.24389 | 4.70002 | 2.21E-05 |
| 334 | ENSG00000103043 | VAC14     | -1.24788 | 4.99586 | 2.73E-06 |
| 335 | ENSG00000076382 | SPAG5     | -1.25553 | 4.84811 | 7.76E-06 |
| 336 | ENSG00000140829 | DHX38     | -1.26122 | 4.64039 | 2.00E-05 |
| 337 | ENSG00000198420 | TCAF1     | -1.26525 | 4.88863 | 3.49E-05 |
| 338 | ENSG00000070366 | SMG6      | -1.26997 | 4.44081 | 6.78E-05 |
| 339 | ENSG00000126464 | PRR12     | -1.28188 | 5.50453 | 2.44E-08 |
| 340 | ENSG00000061273 | HDAC7     | -1.28418 | 4.93608 | 4.37E-06 |
| 341 | ENSG00000151458 | ANKRD50   | -1.29771 | 4.6325  | 1.65E-05 |
| 342 | ENSG00000183853 | KIRREL1   | -1.30882 | 7.54128 | 2.38E-14 |
| 343 | ENSG00000101298 | SNPH      | -1.31718 | 4.52499 | 2.01E-05 |
| 344 | ENSG00000108797 | CNTNAP1   | -1.33676 | 4.25263 | 8.55E-05 |
| 345 | ENSG00000185340 | GAS2L1    | -1.34087 | 4.54482 | 1.03E-05 |
| 346 | ENSG00000078804 | TP53INP2  | -1.35485 | 4.41988 | 2.05E-05 |
| 347 | ENSG00000139613 | SMARCC2   | -1.35593 | 5.37013 | 2.47E-07 |
| 348 | ENSG00000160877 | NACC1     | -1.38394 | 4.70478 | 2.07E-06 |
| 349 | ENSG00000113368 | LMNB1     | -1.39199 | 5.59264 | 5.52E-10 |
| 350 | ENSG00000184675 | AMER1     | -1.43458 | 2.15215 | 4.20E-02 |
| 351 | ENSG00000166897 | ELFN2     | -1.45441 | 5.19417 | 4.38E-08 |
| 352 | ENSG00000101868 | POLA1     | -1.46027 | 4.30357 | 1.61E-05 |
| 353 | ENSG00000160233 | LRRC3     | -1.46726 | 2.42858 | 4.82E-02 |
| 354 | ENSG00000135476 | ESPL1     | -1.46898 | 5.36398 | 9.08E-10 |
| 355 | ENSG00000085872 | CHERP     | -1.47329 | 4.5681  | 4.37E-06 |
| 356 | ENSG00000090975 | PITPNM2   | -1.48735 | 2.44689 | 4.20E-02 |
| 357 | ENSG00000147536 | GIN54     | -1.49165 | 2.45098 | 3.90E-02 |
| 358 | ENSG00000085117 | CD82      | -1.51339 | 2.47129 | 3.45E-02 |
| 359 | ENSG00000100350 | FOXRED2   | -1.52448 | 4.61088 | 5.51E-07 |
| 360 | ENSG00000110344 | UBE4A     | -1.53031 | 4.47081 | 3.16E-06 |
| 361 | ENSG00000148200 | NR6A1     | -1.54771 | 2.25349 | 2.38E-02 |
| 362 | ENSG00000215256 | DHRS4-AS1 | -1.54796 | 2.50262 | 3.62E-02 |
| 363 | ENSG00000118898 | PPL       | -1.55375 | 4.76674 | 2.27E-07 |
| 364 | ENSG00000180884 | ZNF792    | -1.55657 | 2.2626  | 4.78E-02 |
| 365 | ENSG00000149639 | SOGA1     | -1.56396 | 4.73389 | 5.84E-07 |
| 366 | ENSG00000156970 | BUB1B     | -1.58468 | 4.98366 | 4.22E-09 |
| 367 | ENSG00000273820 | USP27X    | -1.5898  | 1.98751 | 2.41E-02 |
| 368 | ENSG00000137802 | MAPKBP1   | -1.64511 | 2.59167 | 1.72E-02 |
| 369 | ENSG00000113209 | PCDHB5    | -1.65836 | 2.35616 | 3.08E-02 |
| 370 | ENSG00000179104 | TMTC2     | -1.70977 | 2.40391 | 2.93E-02 |
| 371 | ENSG00000145246 | ATP10D    | -1.71035 | 2.40435 | 2.13E-02 |
| 372 | ENSG00000179546 | HTR1D     | -1.71477 | 2.40695 | 1.83E-02 |
| 373 | ENSG00000124444 | ZNF576    | -1.73563 | 2.12239 | 4.80E-02 |
| 374 | ENSG00000078177 | N4BP2     | -1.75069 | 2.14342 | 4.91E-02 |

|     |                 |            |          |         |          |
|-----|-----------------|------------|----------|---------|----------|
| 375 | ENSG00000214357 | NEURL1B    | -1.78157 | 2.165   | 3.65E-02 |
| 376 | ENSG00000174943 | KCTD13     | -1.81415 | 2.19564 | 3.28E-02 |
| 377 | ENSG00000185567 | AHNAK2     | -1.84007 | 7.69372 | 1.42E-22 |
| 378 | ENSG00000188322 | SBK1       | -1.87249 | 2.55257 | 9.90E-03 |
| 379 | ENSG00000083097 | DOPEY1     | -1.91288 | 2.29001 | 2.02E-02 |
| 380 | ENSG00000129951 | PLPPR3     | -1.94746 | 2.31993 | 1.96E-02 |
| 381 | ENSG00000133247 | KMT5C      | -1.96626 | 1.94471 | 3.69E-02 |
| 382 | ENSG00000198324 | FAM109A    | -2.02156 | 2.3859  | 1.05E-02 |
| 383 | ENSG00000169951 | ZNF764     | -2.04044 | 2.01236 | 2.79E-02 |
| 384 | ENSG00000272405 | AL365181.3 | -2.0468  | 2.41114 | 7.94E-03 |
| 385 | ENSG00000213763 | ACTBP2     | -2.07149 | 2.43889 | 3.40E-03 |
| 386 | ENSG00000256087 | ZNF432     | -2.0834  | 2.05544 | 2.40E-02 |
| 387 | ENSG00000269416 | LINC01224  | -2.15759 | 2.51166 | 3.81E-03 |
| 388 | ENSG00000272031 | ANKRD34A   | -2.22547 | 2.18456 | 1.43E-02 |
| 389 | ENSG00000270504 | AL391422.3 | -2.24214 | 2.2072  | 4.21E-03 |
| 390 | ENSG00000178401 | DNAJC22    | -2.2493  | 2.2088  | 9.35E-03 |
| 391 | ENSG00000239665 | AL157392.3 | -2.36185 | 2.3109  | 9.09E-04 |
| 392 | ENSG00000197705 | KLHL14     | -2.3629  | 2.32217 | 7.83E-03 |
| 393 | ENSG00000110400 | NECTIN1    | -2.38314 | 2.33714 | 6.01E-03 |
| 394 | ENSG00000163093 | BBS5       | -2.38718 | 1.78496 | 7.09E-03 |
| 395 | ENSG00000184545 | DUSP8      | -2.40733 | 1.80458 | 2.52E-02 |
| 396 | ENSG00000165821 | SALL2      | -2.43562 | 2.3804  | 3.58E-03 |
| 397 | ENSG00000171992 | SYNPO      | -2.44496 | 2.39151 | 3.44E-03 |
| 398 | ENSG00000100592 | DAAM1      | -2.47066 | 1.86449 | 2.21E-02 |
| 399 | ENSG00000141448 | GATA6      | -2.61849 | 2.00192 | 2.19E-03 |
| 400 | ENSG00000007545 | CRAMP1     | -2.73237 | 2.10933 | 6.41E-03 |
| 401 | ENSG00000135439 | AGAP2      | -2.80063 | 2.17133 | 8.03E-04 |
| 402 | ENSG00000135338 | LCA5       | -3.55409 | 1.94867 | 8.20E-04 |
| 403 | ENSG00000181896 | ZNF101     | -3.65445 | 2.04052 | 3.08E-04 |
| 404 | ENSG00000133069 | TMCC2      | -8.98839 | 1.75942 | 1.61E-05 |
